# Supplementary material
Source: HighWire-hosted journal article supplement (doi:10.1101/rna.065144.117)
Supplement: Supplemental_Material.docx [file Supplemental_Material.docx]

**Direct quantification of 3’ terminal 2'-O-methylation of small RNAs by RT-qPCR**

Nan Wang1*, Shuang Qu1*, Ziyi Zeng2*, Hongwei Liang1*, Wu Sun1, Xi Chen1¶, Chen-Yu Zhang1¶, and Ke Zen1¶

**CONTENTS**

**Table S1**. Oligonucleotides used in this study.

**Figure S1**. Quantification of miR-16 methylation ratio by ΔCt method.

**Figure S2**. Comparison of the accuracy of miRNA methylation ratio predicted by the nonlinear regression method and the ΔCt method.

**Table S1. Oligonucleotides used in this study.**

| **type** | **label** | **sequence** |
| --- | --- | --- |
| **RNA** | **hsa-miR-16-5p** | UAGCAGCACGUAAAUAUUGGCG |
| **RNA** | **hsa-miR-16-5p 2’Ome** | UAGCAGCACGUAAAUAUUGGC2’OmeG |
| **RNA** | **hsa-miR-21-5p** | UAGCUUAUCAGACUGAUGUUGA |
| **RNA** | **hsa-miR-21-5p 2’Ome** | UAGCUUAUCAGACUGAUGUUG2’OmeA |
| **RNA** | **ath-miR-168a-5p** | UCGCUUGGUGCAGGUCGGGAA |
| **RNA** | **ath-miR-168a-5p 2’Ome** | UCGCUUGGUGCAGGUCGGGA2’OmeA |
| **RNA** | **dme-miR-34-5p** | UGGCAGUGUGGUUAGCUGGUUGUG |
| **RNA** | **dme-miR-34-5p 2’Ome** | UGGCAGUGUGGUUAGCUGGUUGU2’OmeG |
| **RNA** | **dme-miR-317-3p** | UGAACACAGCUGGUGGUAUCCAGU |
| **RNA** | **dme-miR-317-3p 2’Ome** | UGAACACAGCUGGUGGUAUCCAG2’OmeU |
| **RNA** | **dme-miR-305-5p** | AUUGUACUUCAUCAGGUGCUCUG |
| **RNA** | **dme-miR-305-5p 2’Ome** | AUUGUACUUCAUCAGGUGCUCU2’OmeG |
| **RNA** | **dme-miR-263a-5p** | AAUGGCACUGGAAGAAUUCACGGG |
| **RNA** | **dme-miR-263a-5p 2’Ome** | AAUGGCACUGGAAGAAUUCACGG2’OmeG |
| **RNA** | **dme-miR-11-3p** | CAUCACAGUCUGAGUUCUUGC |
| **RNA** | **dme-miR-11-3p 2’Ome** | CAUCACAGUCUGAGUUCUUG2’OmeC |
| **DNA** | **hsa-miR-21 stem-loop RT primer** | CTCAACTGGTGTCGTGGAGTCGGCAATTCAGTTGAGTCAACATC |
| **DNA** | **hsa-miR-21 sense primer** | ACACTCCAGCTGGGTAGCTTATCAGACTGA |
| **DNA** | **hsa-miR-16 stem-loop RT primer** | CTCAACTGGTGTCGTGGAGTCGGCAATTCAGTTGAGCGCCAATA |
| **DNA** | **hsa-miR-16 sense primer** | ACACTCCAGCTGGGTAGCAGCACGTAAATA |
| **DNA** | **ath-miR-168 stem-loop RT primer** | CTCAACTGGTGTCGTGGAGTCGGCAATTCAGTTGAGTTCCCGAC |
| **DNA** | **ath-miR-168 sense primer** | ACACTCCAGCTGGGTCGCTTGGTGCAGGT |
| **DNA** | **dme-miR-34-5p stem-loop RT primer** | CTCAACTGGTGTCGTGGAGTCGGCAATTCAGTTGAGCACAACCA |
| **DNA** | **dme-miR-34-5p sense primer** | ACACTCCAGCTGGGTGGCAGTGTGGTTAGCTG |
| **DNA** | **dme-miR-317-3p stem-loop RT primer** | ACACTCCAGCTGGGTGAACACAGCTGGTGGTA |
| **DNA** | **dme-miR-317-3p sense primer** | ACACTCCAGCTGGGTGAACACAGCTGGTGGTA |
| **DNA** | **dme-miR-305-5p stem-loop RT primer** | CTCAACTGGTGTCGTGGAGTCGGCAATTCAGTTGAGCAGAGCAC |
| **DNA** | **dme-miR-305-5p sense primer** | ACACTCCAGCTGGGATTGTACTTCATCAGGT |
| **DNA** | **dme-miR-263a-5p stem-loop RT primer** | CTCAACTGGTGTCGTGGAGTCGGCAATTCAGTTGAGCCCGTGAA |
| **DNA** | **dme-miR-263a-5p sense primer** | ACACTCCAGCTGGGAATGGCACTGGAAGAATT |
| **DNA** | **dme-miR-11-3p stem-loop RT primer** | CTCAACTGGTGTCGTGGAGTCGGCAATTCAGTTGAGGCAAGAAC |
| **DNA** | **dme-miR-11-3p sense primer** | ACACTCCAGCTGGGCATCACAGTCTGAGT |
| **DNA** | **URP** | TGGTGTCGTGGAGTCG |


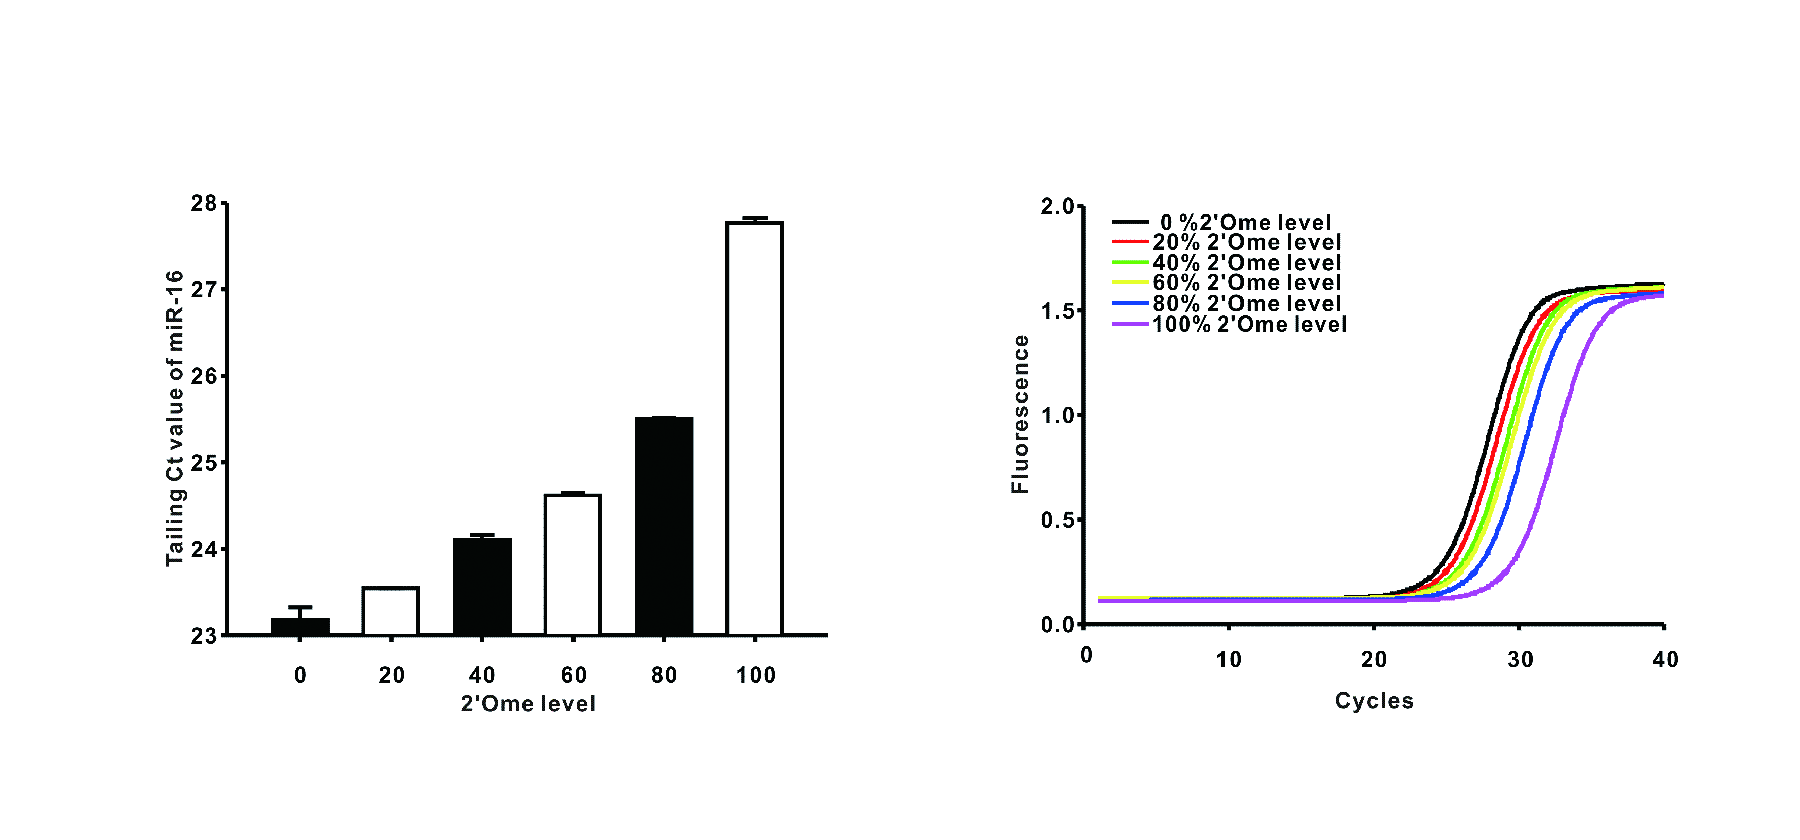


**Figure S1.** **Quantification of miR-1 methylation ratio by ΔCt method.** A) Poly(A)-tailed RT-qPCR Ct values of synthetic miR-16 with different methylation ratio and the corresponding amplification curves. The total miR-16 concentration for each sample is 100 pM. Note that the Ct values present a gradient trend associated with increase of 2’Ome level.





**Figure S2. Comparison of the accuracy of miRNA methylation ratio predicted by the nonlinear regression method and the ΔCt method.** A) Methylation ratio of 100pM MIR168 predicted by the nonlinear regression method (left) and the linear ΔCt method (right). B) Methylation ratio of 100pM miR-21 predicted by the nonlinear regression method (left) and the linear ΔCt method (right). C) Methylation ratio of 1pM miR-21 predicted by the nonlinear regression method (left) and the linear ΔCt method (right). Upper left in each figure showed the goodness-of-fit. Data were presented as Mean ± SE (n=6). Note that the nonlinear regression method provides a miRNA methylation prediction with a higher accuracy compared to the linear ΔCt method.
